# Supplementary material
Source: PubMed Central journal article supplement (PMC9530017)
Supplement: NIHMS1838063-supplement-1.pdf [file NIHMS1838063-supplement-1.pdf]

## 1 Supplemental Material

## 2 Supplemental Figures

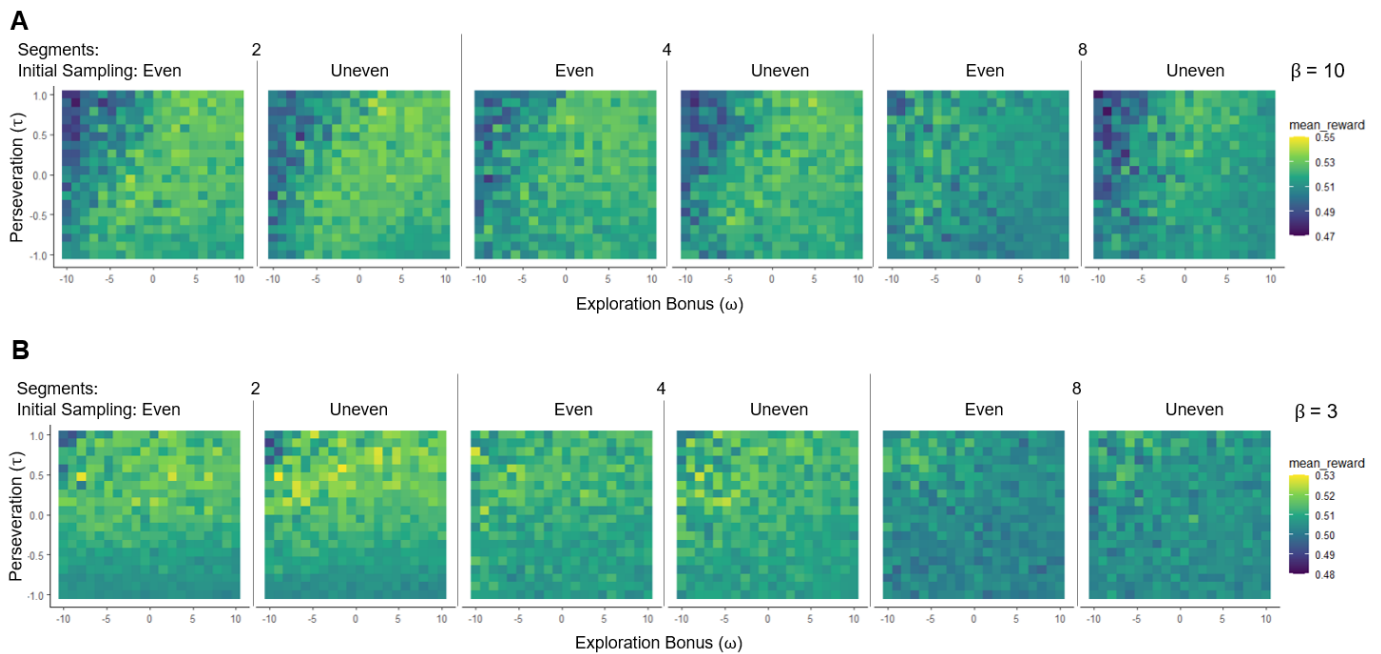

3

4 Supplemental Figure 1. A. Simulated performance (average reward within each participant and averaged  
 5 across participants) for an inverse temperature value of 10 for each combination of exploration bonus (X  
 6 axis) and perseveration (Y axis) parameter values and including a smaller environment size. Each panel  
 7 indicates performance by the number of segments (2, 4, or 8) and type of initial sampling (even or  
 8 uneven). B. Simulated performance, presented as in panel A, for an inverse temperature value of 3.

9

10

1

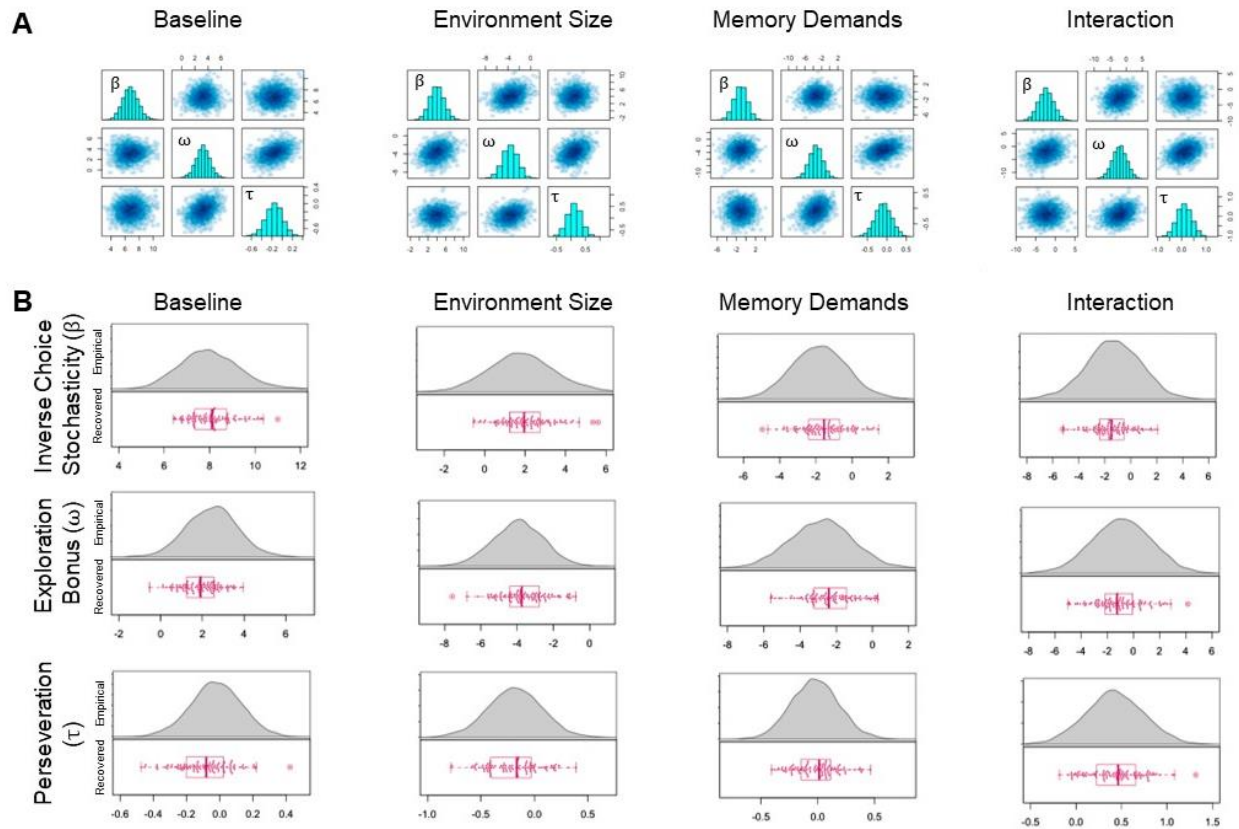

2

3 Supplemental Figure 2. Parameter correlations and model recovery. A. Pairs plots showing histograms of  
 4 each parameter (diagonal) and scatterplots of posterior samples for each combination of parameter  
 5 values. Panels indicate parameters during the reference (minimal cognitive load) condition and for each  
 6 change in cognitive demands. Scatterplots show that samples are not correlated across different  
 7 parameters. B. Recovery of median parameter values from 100 simulated datasets (bottom box and  
 8 beeswarm plots) versus the posterior distribution of the parameter fit to empirical data (top density  
 9 plots). X axis shows parameter values. Columns indicate parameters during the reference (minimal  
 10 cognitive load) condition and for each change in cognitive demands and rows indicate different  
 11 parameters.
